# Supplementary material
Source: Springer Nature journal article supplement (https://www.springermedizin.de/resource/supplementary/13063_2009_373_MOESM2_ESM.pdf/9618092)
Supplement: MOESM2 [file 9618092]

**Step 1: Training opinion leaders**

One physician and one midwife,  
(service chiefs) per hospital  
Recertification after one year

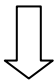

**Step 2: Creating and training a  
multidisciplinary audit committee**

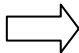

**Step 3:  
Launching the  
audit cycle**

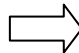

**Step 4: Training  
qualified personnel in  
best practices**

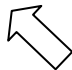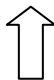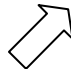

**Educational outreach visits by external facilitators**
